# Supplementary material for: Role of OmpA2 surface regions of Porphyromonas gingivalis in host–pathogen interactions with oral epithelial cells
Source: PubMed Central journal article supplement (PMC5300881; doi:10.1002/mbo3.401), 2016-09-06

Fig S2

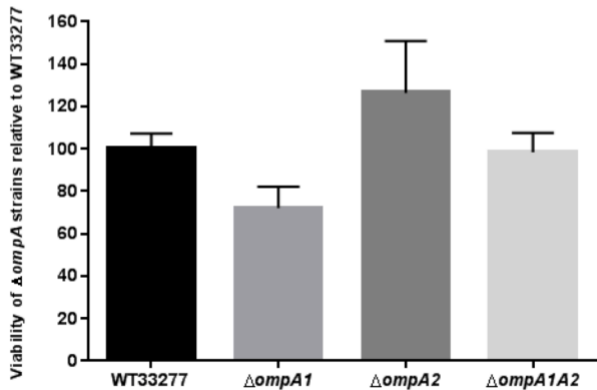

Supplement: MBO3-6-0-s002.pdf [file MBO3-6-0-s002.pdf]
